# Supplementary material for: Winter’s Toll: Assessing the Public Health Impact of Cold-Related Illnesses and Energy Damage in Ukraine During the Invasion
Source: Research Square preprint supplement (doi:10.21203/rs.3.rs-6589736/v1), 2025-06-04
Supplement: Supplementary file 1 [file 022c4c8d32ebd73de09c0a0b.docx]

**Table S1: Participant information**

| **Variable** | **N (%)** |
| --- | --- |
| **Gender**  Male | 1147 (49.7%) |
| Female | 1162 (50.3%) |
| **Pregnant status (Female only)** |  |
| Yes | 28 (2.4%) |
| No | 1104 (95.0%) |
| Don't know | 30 (2.6%) |
| **Living area** |  |
| Urban area | 1700 (73.6%) |
| Suburban area | 211 (9.1%) |
| Rural area | 398 (17.2%) |
| **Property type** |  |
| Own apartment | 971 (42.1%) |
| Own house | 695 (30.1%) |
| Rented accommodation | 366 (15.9%) |
| With a host (for example, my relatives, friends, or people I know) | 236 (10.2%) |
| With a host (unfamiliar people provided shelter) | 13 (0.6%) |
| Hotel or Hostel | 2 (0.1%) |
| Collective accommodation center (pre-existing buildings and structures where large groups of displaced people find shelter | 22 (1.0%) |
| Other forms of emergency accommodation (e.g., tent, tarp, trailer, etc) | 4 (0.2%) |
| **Are you registered as an internally displaced person (IDP)?** |  |
| Yes | 281 (12.2%) |
| No | 1951 (84.5%) |
| Don’t know | 47 (2.0%) |
| Refuse to answer | 30 (1.3%) |
| **Education Level** |  |
| Less than primary/mandatory | 10 (0.4%) |
| Completed primary/mandatory | 53 (2.3%) |
| Completed general/Secondary | 239 (10.4%) |
| Completed Vocational School | 633 (27.4%) |
| Completed an undergraduate degree or above | 1374 (59.5%) |
| **What is your legal marital status?** |  |
| Single, have never been married | 429 (18.6%) |
| In a relationship but not living with my partner | 97 (4.2%) |
| In a relationship and living with my partner | 242 (10.5%) |
| Married | 1181 (51.1%) |
| Married, but forced to live separately after the Russian invasion of Ukraine | 46 (2.0%) |
| Separated, but still legally married | 31 (1.3%) |
| Divorced | 212 (9.2%) |
| Widowed before the Russian invasion of Ukraine | 60 (2.6%) |
| Widowed after the Russian invasion of Ukraine, but not a result of the war (e.g., heart attack, cancer) | 11 (0.5%) |
| **Thinking in 2021, What was your employment status in 2021?** |  |
| Full-time employed (including self-employment) | 1515 (65.6%) |
| Part-time employed | 288 (12.5%) |
| Unemployed | 180 (7.8%) |
| Student | 135 (5.8%) |
| Retired | 114 (4.9%) |
| Disable | 33 (1.4%) |
| Refused | 27 (1.2%) |
| Don't know | 17 (0.7%) |
| **Thinking back, which of the following best describes your overall work schedule (including all jobs) in 2021?** |  |
| Traditional 9 AM to 5 PM day | 1415 (61.3%) |
| Evening or nights | 76 (3.3%) |
| Early mornings | 75 (3.2%) |
| Variable (early mornings, days, and nights) | 445 (19.3%) |
| Refused | 110 (4.8%) |
| Don't know | 188 (8.1%) |
| **What is your current employment status?** |  |
| Full-time employed (including self-employment) | 873 (37.8%) |
| Part-time employed | 490 (21.2%) |
| Unemployed | 404 (17.5%) |
| Temporarily unemployed due to the ongoing war | 198 (8.6%) |
| Student | 94 (4.1%) |
| Retired | 146 (6.3%) |
| Disabled not due to war | 43 (1.9%) |
| Disabled due to war | 6 (0.3%) |
| Refused | 33 (1.4%) |
| Don't know | 22 (1.0%) |
| **Which of the following best describes your current work schedule (including all jobs)?** |  |
| Traditional 9 AM to 5 PM day | 1011 (43.8%) |
| Evening or nights | 111 (4.8%) |
| Early mornings | 83 (3.6%) |
| Variable (early mornings, days, and nights) | 493 (21.4%) |
| Refused | 193 (8.4%) |
| Don't know | 418 (18.1%) |
| **Are you currently employed in one of the following occupations?** |  |
| Health worker (e.g., doctor, nurse, physiotherapist) | 57 (2.5%) |
| Emergency and rescue service worker | 8 (0.3%) |
| Aid worker | 97 (4.2%) |
| Social services | 29 (1.3%) |
| Police officer | 9 (0.4%) |
| Firefighter | 4 (0.2%) |
| Armed Forces (including Territorial Defense Forces) | 40 (1.7%) |
| None of the above | 2065 (89.4%) |
| **Do you have any long-term illness, health problem, or handicap that limits your daily activities or the work you can do?** |  |
| Yes | 626 (27.1%) |
| No | 1682 (72.9%) |

**Table S2: Were you affected (e.g., loss of property, family members, forced evacuation, loss of job) by the Russian invasion of eastern Ukraine in 2014?**

| **Problem** | n | % |
| --- | --- | --- |
| Lost the job | 434 | 18.80 |
| Experienced financial hardship | 412 | 17.84 |
| Home destroyed | 106 | 4.59 |
| Home invading | 96 | 4.16 |
| Need to migrate within the country | 160 | 6.93 |
| Need to migrate | 22 | 0.95 |
| Forcible separation from family | 44 | 1.91 |
| Physical injury | 11 | 0.48 |
| Physical injury of a family member | 41 | 1.78 |
| Missing family member | 18 | 0.78 |
| Death of a family member | 54 | 2.34 |

**Table S3: Distribution of the study population before and after the war in the Oblast (n=24).**

| **Oblasts** | Where did you live when the war started on February 24th, 2022?  n (%) | Where do you currently live in Ukraine?  n (%) |
| --- | --- | --- |
| Cherkasy | 83 (3.6%) | 94 (4.1%) |
| Chernihiv | 76 (3.3%) | 77 (3.3%) |
| Chernivtsi | 67 (2.9%) | 72 (3.1%) |
| Dnipropetrovsk | 232 (10.0%) | 250 (10.8%) |
| Donetsk | 61 (2.6%) | 8 (0.3%) |
| Ivano-Frankivsk | 97 (4.2%) | 109 (4.7%) |
| Kharkiv | 234 (10.1%) | 196 (8.5%) |
| Kherson | 20 (0.9%) | 9 (0.4%) |
| Khmelnytskyi | 96 (4.2%) | 99 (4.3%) |
| Kyiv | 66 (2.9%) | 59 (2.6%) |
| M. Kyïv [Kiev City] | 162 (7.0%) | 163 (7.1%) |
| Kirovohrad | 68 (2.9%) | 73 (3.2%) |
| Luhansk | 15 (0.6%) | 200 (8.7%) |
| Lviv | 186 (8.1%) | 79 (3.4%) |
| Mykolaiv | 79 (3.4%) | 43 (1.9%) |
| Odessa | 43 (1.9%) | 109 (4.7%) |
| Poltava | 93 (4.0%) | 92 (4.0%) |
| Rivne | 86 (3.7%) | 83 (3.6%) |
| Sumy | 81 (3.5%) | 73 (3.2%) |
| Ternopil | 74 (3.2%) | 83 (3.6%) |
| Vinnytsia | 115 (5.0%) | 121 (5.2%) |
| Volyn | 76 (3.3%) | 83 (3.6%) |
| Zakarpattia | 87 (3.8%) | 101 (4.4%) |
| Zaporizhia | 31 (1.3%) | 15 (0.6%) |
| Zhytomyr | 77 (3.3%) | 91 (3.9%) |

**Table S4: Living Conditions in Oblast (Before and after war)**

| **Living environment** | Agree  n (%) | Disagree  n (%) |
| --- | --- | --- |
| Cold | 559 (24.21) | 1750 (75.79) |
| Damp | 738(31.96) | 1571 (68.04) |
| Crowded | 569 (24.64) | 1740 (75.36) |
| Poor ventilation | 427 (18.49) | 1882 (81.51) |
| Poor indoor air quality | 341 (14.77) | 1968 (85.23) |
| Noisy | 502 (21.74) | 1807 (78.26) |
| Not safe and secure | 619 (26.81) | 1690 (73.19) |
| Frequent outages of power | 706 (30.58) | 1603 (69.42) |

**Table S5: Basic facilities access**

| **Do you have consistent access to the following basic services in your settlement?** | Inconsistent access  n (%) | Consistent access n (%) | Don’t know  n (%) |
| --- | --- | --- | --- |
| Food shop | 112 (4.85) | 2188 (94.8) | 9 (0.4) |
| Public transport | 376 (16.28) | 1907 (82.6) | 26 (1.1) |
| Ukrposhta /post office | 224 (9.70) | 2074 (89.8) | 11 (0.5) |
| Policlinic | 359 (15.55) | 1899 (82.2) | 51 (2.2) |
| Hospital | 409 (17.71) | 1816 (78.6) | 84 (3.6) |
| Family doctor | 422 (18.28) | 1795 (77.7) | 92 (4.0) |
| Pharmacy | 230 (9.96) | 2070 (89.6) | 9 (0.4) |
| Ambulance | 292 (12.65) | 1816 (78.6) | 201 (8.7) |
| Centre for Administrative Services | 399 (17.28) | 1733 (75.1) | 177 (7.7) |
| Humanitarian aid | 892 (38.63) | 721 (31.2) | 696 (30.1) |

**Table S6: Have you received any of the following forms of assistance since the war?**

| **Assistance form** | Yes  n (%) | No  n (%) |
| --- | --- | --- |
| Cash transfers or financial assistance | 782 (33.9) | 1527 (66.1) |
| Essential food and non-food assistance (clothing, hygiene items, blankets) | 684 (29.6) | 1625 (70.4) |
| Counseling and psychological support | 155 (6.7) | 2154 (93.3) |
| Legal aid | 168 (7.3) | 2141 (92.7) |
| Shelter and housing | 205 (8.9) | 2104 (91.1) |
| Housing subsidy | 225 (9.7) | 2084 (90.3) |

**Table S7. What have you done to adapt to this winter season? (December 2022-February, 2023)**

| **Adaptation measures** | Yes  n (%) | No  n (%) | No need  n (%) |
| --- | --- | --- | --- |
| Purchased warm clothes | 1299 (56.3) | 364 (15.8) | 646 (28.0) |
| Stored food and water | 1556 (67.4) | 318 (13.8) | 435 (18.8) |
| Purchased logs/wood, coal, fuel, briquettes, fuel pellets | 705 (30.5) | 660 (28.6) | 944 (40.9) |
| Installed metal-plastic windows | 550 (23.8) | 891 (38.6) | 868 (37.6) |
| Installed insulation) | 449 (19.4) | 1216 (52.7) | 644 (27.9) |
| Performed repairs) | 298 (12.9) | 1391 (60.2) | 620 (26.9) |
| Registered the (for) housing subsidy | 223 (9.7) | 1706 (73.9) | 380 (16.5) |
| Other | 206 (8.9) | 1199 (51.9) | 904 (39.2) |

**Table S8: Do you have the following heating systems in the place you currently live?**

| **Heating system** | Yes  n (%) | No  n (%) | Not sure  n (%) |
| --- | --- | --- | --- |
| Air conditioners | 466 (20.2) | 1817 (78.69) | 26 (1.13) |
| Furnaces | 595 (25.77) | 1680 (72.76) | 34 (1.17) |
| Boilers | 1227 (53.14) | 1055 (45.69) | 27 (1.17) |
| Heat pumps | 216 (9.35) | 1967 (85.19) | 126 (5.46) |
| Gas-fired space heaters | 769 (33.30) | 1467 (63.53) | 73 (3.16) |
| Unvented gas-fired heaters | 151 (6.54) | 2011 (87.09) | 147 (6.37) |
| Electric space heaters | 1482 (64.18) | 776 (33.61) | 51 (2.21) |
| Wood-burning and pellet stoves | 592 (25.64) | 1674 (72.50) | 43 (1.86) |
| Fireplaces | 203 (8.79) | 2072 (89.74) | 34 (1.47) |
| Radiant floor heat | 380 (16.46) | 1894 (82.03) | 35 (1.52) |
| Combined heat and power (CHP) | 345 (14.94) | 1753 (75.92) | 35 (1.52) |
| Generators fueled by diesel | 177 (7.67) | 2092 (90.60) | 40 (1.73) |
| Solar heating | 49 (2.12) | 2233 (96.71) | 27 (1.17) |
| Other | 173 (7.49) | 1581 (68.47) | 555 (24.04) |

**Table S9: Do you take the following ways to save energy during the power outage in this winter?**

| **Energy saving technique** | Always  n (%) | Sometimes  n (%) | Never  n (%) | Not applicable  n (%) |
| --- | --- | --- | --- | --- |
| Reset the water heater thermostat | 816 (35.34) | 326 (14.12) | 374 (16.2) | 793 (34.3) |
| Turn thermostat down | 371 (16.06) | 448 (19.40) | 572 (24.8) | 918 (39.8) |
| Turn the air conditioner off | 460 (19.93) | 127(5.50) | 369 (16.0) | 1353 (58.6) |
| Shower without hot water | 225 (9.75) | 791(34.25) | 916 (39.7) | 377 (16.3) |
| Stay warm with clothes and blankets | 1142 (49.46) | 835(36.16) | 173 (7.5) | 159 (6.9) |
| Others | 190 (8.23) | 265(11.47) | 712 (30.8) | 1142 (49.5) |

**Table S10: Do you have the following concerns regarding getting through the winter season?**

| **Concerns** | No concern  n (%) | Minor concern  n (%) | Major concern  n (%) |
| --- | --- | --- | --- |
| Not enough income/low income | 277 (12.0) | 990 (42.9) | 1042 (46.1) |
| Price increase | 63 (2.7) | 530 (23.0) | 1716 (74.3) |
| Size of pension | 1096 (47.5) | 320 (13.9) | 893 (38.7) |
| Inflation | 190 (8.2) | 623 (27.0) | 1496 (64.8) |
| Currency exchange rate | 323 (14.0) | 889 (38.5) | 1097 (47.5) |
| Not enough food | 1250 (54.1) | 818 (35.4) | 241 (10.4) |
| Not enough medicines | 1154 (50.0) | 857 (37.1) | 298 (12.9) |
| Not enough logs/wood, coal, fuel briquettes, fuel pellets | 1729 (74.9) | 395 (17.1) | 185 (8.0) |
| The central heating and water supply system will probably be ruined by shelling | 1051 (45.5) | 493 (21.4) | 765 (33.1) |
| Ruined house/flat | 1647 (71.3) | 170 (7.4) | 492 (21.3) |
| Need to insulate (repair) the house | 1033 (44.7) | 665 (28.8) | 611 (26.5) |
| No housing subsidy or its low-level | 964 (41.7) | 607 (26.3) | 738 (32.0) |
| No support | 897 (38.8) | 664 (28.8) | 748 (32.4) |
| Other | 1742 (75.4) | 291 (12.6) | 276 (12.0) |

| **Infectious Diseases** | Individuals diagnosed with the infectious disease | | | Have access to medications or treatments for the diseases? | | |
| --- | --- | --- | --- | --- | --- | --- |
| Yes | No | Not sure | Yes | No | Not sure |
| n (%) | n (%) | n (%) | n (%) | n (%) | n (%) |
| Respiratory infections  and symptoms | 1737 (75.2) | 513 (22.2) | 59 (2.6) | 1645 (94.7) | 69 (4.0) | 23 (1.3) |
| Flu | 994 (43.0) | 1097 (47.5) | 218 (9.4) | 940 (94.6) | 45 (4.5) | 9 (0.9) |
| COVID-19 | 326 (14.1) | 1746 (75.6) | 237 (10.3) | 299 (91.7) | 21 (6.4) | 6 (1.8) |
| Pneumonia | 95 (4.1) | 2155 (93.3) | 59 (2.6) | 80 (84.2) | 11 (11.6) | 4 (4.2) |
| Rhinorrhea | 109 (4.7) | 2071 (89.7) | 129 (5.6) | 104 (95.4) | 3 (2.8) | 2 (1.8) |
| Cough | 1704 (73.8) | 540 (23.4) | 65 (2.8) | 1610 (94.5) | 70 (4.1) | 24 (1.4) |
| Sneeze | 1569 (68.0) | 648 (28.1) | 92 (4.0) | 1440 (91.8) | 65 (4.1) | 64 (4.1) |
| Fever | 1168 (50.6) | 1042 (45.1) | 99 (4.3) | 1119 (95.8) | 40 (3.4) | 9 (0.8) |
| Sore throat | 1446 (62.6) | 781 (33.8) | 82 (3.6) | 1371 (94.8) | 44 (3.0) | 31 (2.1) |

**Table S11: Infectious disease reported and treated in the winter season (December 2022-February 2023)**

**Table S12: Cold injuries reported and treated in the winter season (December 2022-February 2023)**

| **Cold injuries** | Individuals diagnosed with the infectious disease | | | Have access to the medications or treatments for diseases | | |
| --- | --- | --- | --- | --- | --- | --- |
| Yes | No | Not sure | Yes | No | Not sure |
| n (%) | n (%) | n (%) | n (%) | n (%) | n (%) |
| Hypothermia | 72 (3.1) | 2100 (90.9) | 137 (5.9) | 58 (80.6) | 8 (11.1) | 6 (8.3) |
| Frostnip | 33 (1.4) | 2246 (97.3) | 30 (1.3) | 22 (66.7) | 8 (24.2) | 3 (9.1) |
| Frostbite | 11 (0.5) | 2278 (98.7) | 20 (0.9) | 8 (72.7) | 3 (27.3) | __ |
| Trench foot | 15 (0.6) | 2227 (96.4) | 67 (2.9) | 7 (46.7) | 8 (53.3) | __ |
| Chilblains | 22 (1.0) | 2266 (98.1) | 21 (0.9) | 18 (81.8) | 4 (18.2) | __ |
| Raynaud’s | 15 (0.6) | 2232 (96.7) | 62 (2.7) | 8 (53.3) | 5 (33.3) | 2 (13.3) |
| Cornea | 3 (0.1) | 2286 (99.0) | 20 (0.9) | 2 (66.7) | 1 (33.3) | __ |

**Table S13: Accidental event experience and treatment during the winter season (December 2022-February 2023)**

| **Accident Event** | Did you or anyone in your home experience the following events during the winter season? | | | Did you or anyone in your home have access to needed medications or treatment? | | |
| --- | --- | --- | --- | --- | --- | --- |
| Yes | No | Not sure | Yes | No | Not sure |
| n (%) | n (%) | n (%) | n (%) | n (%) | n (%) |
| Accidental burns and injuries | 517 (22.4) | 1730 (74.9) | 62 (2.7) | 472 (91.3) | 24 (4.6) | 21 (4.1) |
| Carbon monoxide poisoning | 12 (0.5) | 2285 (99.0) | 12 (0.5) | 9 (75.0) | 2 (16.7) | 1 (8.3) |
| Alcohol poisoning | 103 (4.5) | 2161 (93.6) | 45 (1.9) | 86 (83.5) | 6 (5.8) | 11 (10.7) |
| Suicide attempts | 16 (0.7) | 2208 (95.6) | 43 (1.9) | 25 (43.1) | 22 (37.9) | 11 (19.0) |
| Heart Attack | 135 (5.8) | 1917 (85.4) | 203 (8.8) | 114 (84.4) | 11 (8.1) | 10 (7.4) |
| Stroke | 18 (0.8) | 2252 (97.5) | 39 (1.7) | 15 (78.9) | 3 (15.8) | 1 (5.3) |

**Table S14: Winter impacts (December 2022-February 2023) on children in your household**

| **Disease** | Yes  n (%) | No  n (%) | Don’t Know  n (%) |
| --- | --- | --- | --- |
| Respiratory infections and symptoms  (namely, Upper Respiratory Infection) | 993 (87.7) | 129 (11.4) | 10 (0.9) |
| Flu | 474 (41.9) | 586 (51.8) | 72 (6.4) |
| COVID | 103 (9.1) | 921 (81.4) | 108 (9.5) |
| Pneumonia | 36 (3.2) | 1070 (94.5) | 26 (2.3) |
| Hypothermia | 16 (1.4) | 1091 (96.4) | 25 (2.2) |
| Frostnip | 5 (0.4) | 1118 (98.8) | 9 (0.8) |
| Frostbite | 1 (0.1) | 1121 (99.0) | 10 (0.9) |
| Immersion foot  (formerly called trench foot) | __ | 1114 (98.4) | 18 (1.6) |
| Chilblains | 3 (0.3) | 1119 (98.9) | 10 (0.9) |
| Raynaud’s disease | 1 (0.1) | 1111 (98.1) | 20 (1.8) |
| Freezing of cornea | __ | 1124 (99.3) | 8 (0.7) |
| Accidental burns and injuries | 186 (16.4) | 930 (82.2) | 16 (1.4) |
| Carbon monoxide poisoning | __ | 1125 (99.4) | 7 (0.6) |
| Alcohol poisoning | 12 (1.1) | 1111 (98.1) | 9 (0.8) |
| Suicide attempts | 3 (0.3) | 1121 (99.0) | 8 (0.7) |
| No access to flu vaccination | 37 (3.3) | 1008 (89.0) | 87 (7.7) |
| Lack of access to healthcare | 26 (2.3) | 1084 (95.8) | 22 (1.9) |
| Lack of food  (Inadequate food access) | 32 (2.8) | 1084 (95.8) | 16 (1.4) |
| Lack of warm clothes  (Insufficient access to warm clothing) | 43 (3.8) | 1077 (95.1) | 12 (1.1) |
| Experience some form of violence (domestic violence, sexual violence, militant violence, etc.) | 9 (0.8) | 1109 (98.0) | 14 (1.2) |
| Depression | 138 (12.2) | 925 (81.7) | 69 (6.1) |
| Anxiety | 394 (34.8) | 666 (58.8) | 72 (6.4) |

**Table S15: Winter impacts (December 2022-February 2023) on pregnant women in your household**

| **Disease** | Yes  n (%) | No  n (%) | Don’t Know  n (%) |
| --- | --- | --- | --- |
| Respiratory infections and symptoms (namely, Upper Respiratory Infection) | 28 (59.6) | 16 (34.0) | 3 (6.4) |
| Flu | 11 (23.4) | 31 (66.0) | 5 (10.6) |
| COVID | 3 (6.4) | 41(87.2) | 3 (6.4) |
| Pneumonia | __ | 46 (97.9) | 1 (2.1) |
| Hypothermia | 1 (2.1) | 45 (95.7) | 1 (2.1) |
| Frostnip | __ | 46 (97.9) | 1 (2.1) |
| Frostbite | __ | 47 (100.0) | __ |
| Immersion foot (formerly called trench foot) | __ | 47 (100.0) | __ |
| Chilblains | 1 (2.1) | 46 (97.9) | __ |
| Raynaud’s disease | 1 (2.1) | 46 (97.9) | __ |
| Freezing of cornea | __ | 47 (100.0) | __ |
| Accidental burns and injuries | 3 (6.4) | 43 (91.5) | 1 (2.1) |
| Carbon monoxide poisoning | 1 (2.1) | 46 (97.9) | __ |
| Alcohol poisoning | 1 (2.1) | 46 (97.9) | __ |
| Suicide attempts | __ | 47 (100.0) | __ |
| No access to flu vaccination | 1 (2.1) | 43 (91.5) | 3 (6.4) |
| Lack of access to healthcare | __ | 47 (100.0) | __ |
| Lack of food | 1 (2.1) | 45 (95.7) | 1 (2.1) |
| Lack of warm clothes | __ | 46 (97.9) | 1 (2.1) |
| Experience some form of violence | __ | 45 (95.7) | 2 (4.3) |
| Depression | 6 (12.8) | 35 (74.5) | 6 (12.8) |
| Anxiety | 21 (44.7) | 23 (48.9) | 3 (6.4) |
| Gestational diabetes | __ | 45 (95.7) | 2 (4.3) |
| Preeclampsia | 1 (2.1) | 44 | 2 (4.3) |
| Preterm labor | __ | 45 (95.7) | 2 (4.3) |
| Miscarriage | __ | 47 (100.0) | __ |
| Stillbirth | 1 (2.1) | 46 (97.9) | __ |
| Labor dystocia | __ | 46 (97.9) | 1 (2.1) |
| Maternal death | __ | 47 (100.0) | __ |

**Table S16: Winter impacts (December 2022-February 2023) on the elderly in your household**

| **Disease** | Yes  n (%) | No  n (%) | Don’t Know  n (%) |
| --- | --- | --- | --- |
| Respiratory infections and symptoms (namely, Upper Respiratory Infection) | 838 (80.3) | 184 (17.6) | 22 (2.1) |
| Flu | 439 (42.0) | 515 (49.3) | 90 (8.6) |
| COVID | 131 (12.5) | 801 (76.7) | 112 (10.7) |
| Pneumonia | 56 (5.4) | 950 (91.0) | 38 (3.6) |
| Hypothermia | 65 (6.2) | 929 (89.0) | 50 (4.8) |
| Frostnip | 7 (0.7) | 1016 (97.3) | 21 (2.0) |
| Frostbite | 1 (0.1) | 1021 (97.8) | 22 (2.1) |
| Immersion foot (formerly called trench foot) | 2 (0.2) | 1010 (96.7) | 32 (3.1) |
| Chilblains | 7 (0.7) | 1015 (97.2) | 22 (2.1) |
| Raynaud’s disease | 5 (0.5) | 998 (95.6) | 41 (3.9) |
| Freezing of cornea | - | 1021 (97.8) | 23 (2.2) |
| Accidental burns and injuries | 182 (17.4) | 807 (77.3) | 55 (5.3) |
| Carbon monoxide poisoning | 5 (0.5) | 1025 (98.2) | 14 (1.3) |
| Alcohol poisoning | 25 (2.4) | 996 (95.4) | 23 (2.2) |
| No access to flu vaccination | 49 (4.7) | 912 (87.4) | 83 (8.0) |
| Lack of access to healthcare | 48 (4.6) | 965 (92.4) | 31 (3.0) |
| Lack of food | 34 (3.3) | 989 (94.7) | 21 (2.0) |
| Lack of warm clothes | 43 (4.1) | 981 (94.0) | 20 (1.9) |
| Experience some form of violence | 16 (1.5) | 1011 (96.8) | 17 (1.6) |
| Depression | 196 (18.8) | 741 (7.0) | 107 (10.2) |
| Anxiety | 461 (44.2) | 479 (45.9) | 104 (10.0) |
| Heart Attack | 25 (2.4) | 989 (94.7) | 30 (2.9) |
| Stroke | 53 (5.1) | 950 (91.0) | 41 (3.9) |

**Table S17: Descriptive characteristics of survey respondents**

| **Characteristic** | **All** | **Female** | **Male** | ***p-value*** | **Test Type** |
| --- | --- | --- | --- | --- | --- |
| Respondents, n (%) | 2111 (100) | 1,067 (51) | 1,044 (49) | 0.617 | Chi-Square |
| Respiratory infections and symptoms, n (%) | 1,390 (66) | 763 (72) | 627 (60) | *<0.001* | Chi-Square |
| Cold Injury, n (%) | 92 (4) | 48 (4) | 44 (4) | 0.749 | Chi-Square |
| Moved, n (%) | 225 (11) | 110 (10) | 115 (11) | 0.599 | Chi-Square |
| Age in Years, Average | 40.37 | 37.95 | 42.85 | *<0.001* | T-test |
| Household Size, Average | 3.05 | 3.15 | 2.96 | *0.003* | T-test |
|  |  |  |  |  |  |

**Table S18: Classification performance on respiratory infections and symptoms at the household level (all population) based on the existence of children and elderly in the household**.

| Mean Accuracy | Mean Precision | Mean Recall | Mean F1-Score | Standard Error of Accuracy | Standard Error of Precision | Standard Error of Recall | Standard Error of F1 Score |
| --- | --- | --- | --- | --- | --- | --- | --- |
| 90.44% | 91.56% | 90.44% | 90.02% | 0.00577 | 0.00446 | 0.00577 | 0.00637 |
