# Supplementary material for: Winter’s Toll: Assessing the Public Health Impact of Cold-Related Illnesses and Energy Damage in Ukraine During the Invasion
Source: Research Square preprint supplement (doi:10.21203/rs.3.rs-6589736/v1), 2025-06-04
Supplement: Supplementary file 2 [file 866fa032321c317c94394978.docx]

***Supplement method***

***Data Collection and Preparation:***

Hypothermia is a life-threatening disease that results from peripheral vasoconstriction, which can significantly impair blood flow to the extremities.1 Trench foot or immersion foot is a condition affecting individuals who are exposed to damp conditions at freezing temperatures, leading to poor circulation and potential numbness.2 Chilblain, characterized by persistent cold and damp conditions, can lead to chronic issues like vasculitis, a common issue in young or middle-aged women.3,4 Symptoms of erythrocytosis, characterized by burning or painful itching, typically develop 12-24 hours after a triggering event.4 Frostbite injuries range from superficial to deep, causing numbness, erythema, and skin vesicles and necrosis extending to muscle or bone, causing tissue loss.5 The risk of amputation increases rapidly with the grade from 30% proximal to the distal phalanx to 100% proximal to the metacarpals/tarsals.6 Factors like delayed healthcare facility visits, multiple freeze-thaw cycles, and delays in pharmacologic treatment initiation also impact outcomes.7,8

***Diagnosis and treatment***: Frostbite treatment involves rewarming, wound care, and analgesia, but complete recovery is rare due to frostbite tissues.9 Long-term complications of this condition include cold sensitivity (75%), sensory loss (68%), hyperhidrosis (75%), and chronic pain (67%).10,11 Treatments for cold injuries include sympathetic nerve blocks, vasodilators, and a-blockers, but impaired circulation in affected areas increases susceptibility to future injuries.12 Delays in rewarming to thrombolytic therapy significantly increase the risk of amputation, with a 26.8% decrease in salvage per hour of delay.13 Delays in treatment have been found to increase the likelihood of amputation in patients.14,15 Dual-phase bone scans can be beneficial in guiding treatment in austere environments.16 Triple-phase bone scans are crucial for predicting at-risk tissues at earlier stages, as thrombolytic administration offers potential injury reversal.17The four-level classification scheme, which identifies the depth of injury(First degree: Superficial, may include nonfrozen cold injury; Second degree: Within the dermis; third degree: Full-thickness skin, and Fourth degree: Tissue beneath the skin, including muscle tendon and bone)6,18*,* can provide immediate guidance based on clinical examination*.* The scheme can be simplified by combining levels 1 and 2 as superficial frostbite and levels 3 and 4 as deep frostbite. Depending on the severity of the condition, there are various methods to warm hypothermia patients.9 Winter frostbite injuries affected patients who waited 1 to 6 months for their areas to demarcate and determine the need for amputation.19-21Chilblains are diagnosed using two significant criteria: cold-induced skin lesions and lupus erythematosus evidence, and three minor criteria: coexistence of systemic or discoid lupus erythematosus, response to anti-lupus therapy, and negative cryoglobulin and cold agglutinin studies. Patients must meet major and minor criteria to be diagnosed with definite Chilblains.4 Trench foot treatment involves slow passive rewarming of the affected extremity, with pain control using amitriptyline or other neuropathic pain modalities.22 The primary treatment for severe cases of the disease is surgical, with most patients requiring an amputation.23

***ML models***:

***Decision Trees (DTs): DT***s are a non-parametric supervised learning method for classification and regression tasks. They function by recursively partitioning the input space into distinct regions and assigning a label to each region based on the majority class of the training examples within that region. The structure involves nodes representing decisions based on feature values, with branches corresponding to the outcomes of those decisions. Key parameters include the criterion for splitting nodes (e.g., Gini impurity or entropy), maximum depth (which controls the tree's complexity and prevents overfitting), and minimum samples required to split a node (which affects the granularity of the splits).

***Random Forest (RF): RF***s is an ensemble learning method that improves the accuracy of classification and regression models by combining multiple DTs. Each tree is trained on a random subset of the training data, and the final prediction is made by aggregating the predictions from all individual trees. This approach reduces variance and improves generalization. Key parameters include the number of trees, maximum depth, and minimum samples required to split a node.

**XGBoost:** XGBoost, or eXtreme Gradient Boosting, is an advanced implementation of the gradient boosting framework designed for efficiency and scalability. It sequentially builds an ensemble of models, with each new model correcting errors made by the previous ones. XGBoost is known for its speed and performance in ML competitions. Key parameters include the learning rate (which balances model accuracy and overfitting), number of boosting rounds, subsample ratio (which specifies the proportion of the training data used to grow each tree), and maximum depth.

**AdaBoost:** AdaBoost, or Adaptive Boosting, is an ensemble learning technique that combines multiple weak classifiers to form a strong classifier. It iteratively trains classifiers, giving more weight to misclassified examples at each step to focus on difficult cases. Key parameters include the number of weak learners, each learner's contribution, and the weak learners' maximum depth.

**Support Vector Machines (SVM): SVM**s are powerful supervised learning models for classification and regression. SVMs work by finding the hyperplane that best separates the classes in the input space. Key parameters include the regularization parameter (which controls the trade-off between maximizing the margin and minimizing classification errors) and the kernel function (which maps the input space into a higher-dimensional feature space).

**Neural Networks (Multi-layer Perceptron - MLP):** MLPs are a class of feedforward artificial neural networks used for complex classification and regression tasks. An MLP consists of at least three layers: an input layer, one or more hidden layers, and an output layer. Key parameters include the number of hidden layers and nodes (which determine the network architecture), activation function (which introduces non-linearity into the model), learning rate, and maximum iterations.

Feature importance in ML refers to techniques used to determine the relative significance of each feature (or variable) in a model. Understanding the importance of features helps interpret the model, improve performance, and select the most relevant features. We can build more effective and interpretable models by leveraging different methods to assess feature importance. This research used mean decrease in impurity (MDI) to calculate feature importances.24

***Model validation***

To ensure the robustness and reliability of our ML models, we employed rigorous model validation techniques, including hyperparameter optimization and 5-fold cross-validation. Hyperparameter optimization, particularly through grid search, allowed us to fine-tune the models by identifying the most effective parameter combinations, enhancing their performance. The 5-fold cross-validation provided a comprehensive assessment of model performance by partitioning the data into five subsets, ensuring that each model was trained and validated on different data splits. This process mitigated the risk of overfitting and provided a more accurate estimate of how the models would perform on unseen data. A small sample of positive samples and a high number of input features in predictions for older adults increase the risk of overfitting. In contrast, predicting respiratory infections at the household level, with a larger positive sample size and fewer input features, reduces this risk. The consistency of high accuracy, precision, recall, and F1 scores across different models and datasets, as demonstrated in Tables 1, 2, and 3, underscores the reliability of our findings. The low standard deviation in performance metrics across the folds further confirms the stability and generalization capability of the models. These validation methods confirm that our models accurately predicted seasonal respiratory infections, symptoms, and cold injuries with high sensitivity and specificity across various household conditions.

***Supplement Results***

**Section 1: Demographic Information**

The survey included 49.7% males and 50.3% females, with 73% residing in urban areas, 9.1% in suburban areas, and 17% in rural areas, with 2.4% of respondents being pregnant (Table S1). The unemployment rate doubled (from 7.8% to 17.5%) in 2022 compared with 2021 (before the full-scale Russian invasion) (Table S1). The study revealed that 18.8% lost jobs and 5% experienced partial or destroyed homes (Table S2). Respondents reported relocation between oblasts, with Luhansk, Odesa, Donetsk, and Lviv experiencing the most significant changes, with over 12% internally displaced and 21% relocated since 2022 (Table S3).

**Section 2: Preparation for the Winter Season**

A high proportion of people reported they lived in cold, damp, crowded, poorly ventilated, and noisy environments, and reported frequent outages of power (Table S4). The respondents also reported limited or no access to basic services such as groceries, public transportation, hospitals, health services, etc. (Table S5). Over 5% of respondents received financial, essential, and non-food assistance, counseling, psychological support, temporary shelters, and housing subsidies (Table S6). Only 29.6% of participants received essential food and non-food assistance (Table S6).

More than 30% of people purchased logs/wood, coal, fuel, briquettes, and fuel pellets, and >50% stored food and water and purchased warm clothes (Table S7). Nearly 13.7% could not purchase wood or fuel for home heating (Table S7). Nearly 50% of respondents reported that their heating equipment was either destroyed or never had (Table S8). The survey revealed that 64% of respondents used electricity for home heating, 13.7% couldn't afford fuel pellets, and tried energy-saving measures like resetting thermostats and turning off air conditioners (Table S9). More than 50% of respondents reported concerns about low income, increased prices, high inflation, shortage of food and medicine, and a high probability of the central heating and water supply system being ruined by shelling, lack, or low level of housing subsidy (Table S10). Participants had varying concerns about essential resources: 10.4% worried about food, 12.9% about medicine, 8% about logs or wood, coal or fuel, 33.1% about central heating and water supply systems, and 21.3% about ruined houses/flats (Table S10).

**Infectious diseases and related symptoms**: Nearly 75% of respondents reported respiratory infections and symptoms during the winter season, and 4% reported inaccessibility to medications or treatments for the diseases. At the same time, 43% of respondents reported they had the Flu, and 4.5% reported inaccessibility to medicines or treatments for the diseases. The survey revealed that 14% of respondents had COVID-19, 6.4% had pneumonia, and 11.6% had both, with limited access to medication or treatments. It also revealed that 4.7% of respondents had Rhinorrhea, while 2.8% had inaccessibility to medications or treatments, and 74% had a cough. Most respondents experienced sneezing, with 6.8% reporting inaccessibility to drugs or treatments, while 50.6% experienced fever, with 3.4% reporting similar issues. Most respondents (62.6%) reported experiencing a sore throat, with only 3% claiming inaccessibility to the necessary medications or treatments (Table S11). Overall, 75.2% of participants experienced respiratory infections and symptoms (Table S11).

The study found that 3.1% of respondents had Hypothermia, and 1.4% had Frostnip; with both conditions, 11.1 and 24.2% did not have access to medication or treatments. Overall, 3.76% of participants reported cold injuries, with a 10% prevalence in older adults (> 60 years old). Respondents with Frostbite and Immersion foot reported inaccessibility to medications or treatments, with 27.3% and 53.3%, respectively. The survey revealed that 1% of respondents with Chilblains and 0.6% with Raynaud's disease reported inaccessibility (18.2 and 33.3% respectively) to medications or treatments. Only 0.1% of respondents experienced cornea freezing, with 33.3% unable to access necessary medications or treatments for the disease (Table S12). Nearly 29% of respondents (Table S12) reported a lack of access to medicines for cold injuries.

The study found that 22.4% of respondents experienced accidental burns and injuries, while 4.6% reported inaccessibility to medications or treatments, 0.5% experienced carbon monoxide poisoning, 4.5% experienced alcohol poisoning, and 5.8% experienced heart attack. The study also found that 0.7% of respondents attempted suicide, and 0.8% experienced strokes (Table S13).

Most respondents (49%) have children under 18, with 87.7% having Respiratory infections and symptoms, 41.9% having the Flu, and 9.1% having COVID-19. The survey revealed that 3.2% of respondents had pneumonia, 1.4% had hypothermia, 0.4% had frostnip, 0.1% had frostbite, and 0.3% had chilblains. The survey revealed that 0.1% of respondents had Raynaud's disease, 1.1% had their children experience alcohol poisoning, and 0.3% had attempted suicide. Most respondents (89%) lack access to flu vaccination, healthcare (2.3%), food (2.8%), and warm clothing (3.8%). The study found that 0.8% of children have experienced some form of violence, 12.2% are depressed, and 34.8% have anxiety (Table S14).

The survey revealed that 2.1% of respondents experienced hypothermia, while 2.1% reported experiencing chilblains. It also revealed that 2% of respondents had pregnant women at home, 59.6% had respiratory infections and symptoms, 23.4% had the Flu, 6.4% had COVID-19, 2.1% had Chilblains, and 6.4% had accidental burns and injuries. The study found that 2.1% of pregnant women experienced inadequate food access, 12.8% experienced depression, 44.7% reported their children had anxiety in their children, and 2.1% experienced preeclampsia and stillbirth at home (Table S15).

Most respondents (45.2%) had family members aged 60 or older, with 80.3% experiencing respiratory infections and symptoms, 42% experiencing the flu, and 12.5% experiencing COVID-19 or pneumonia. On the other hand, respondents reported experiencing hypothermia (6.2%), Frostnip (0.7%), Frostbite (0.1%), Immersion foot (0.2%), Chilblains (0.7%), accidental burns and injuries (17.4%).

Most of the population (4.7%) lack access to flu vaccination, healthcare (4.6%), food (3.3%), and warm clothes (4.1%), with 1.5% experiencing violence (domestic violence, sexual violence, militant violence, etc.) (Table S16). Depression and anxiety were reported in 18.8% and 44.2% of older age groups, with heart attacks and stroke also being experienced by this age group (Table S16).

Compared to male respondents, females were more likely to be younger (p<0.001), represent a larger household (p=0.003), and report respiratory infections and symptoms (p<0.001) (Table S17).

Table S18 presents the classification performance for predicting respiratory infections and symptoms at the household level, considering the presence of children and older adult individuals as the input features. The evaluation is based on the average over 5-fold cross-validation. Interestingly, all ML models (DT, RF, XGBoost, AdaBoost, SVM, MLP) achieved identical outcomes using the same input and target features. However, the results are presented based on the DT model for simplicity. The table shows the mean accuracy, precision, recall, and F1 score, along with the standard error for each metric.

As shown in **Figure S1**, the largest group of respondents was between 30 and 44 (42%). Respiratory infections and symptoms were common among households where the index respondent was 30 to 44 years old (78%) or 60 years and older (80%). The rate of cold injury was stable across age groups, between four and five percent. When analyzed by household size, a clear trend emerged that respiratory infections and symptoms were more common as household size increased (**Figure S2**). Households with four or more people were more likely to report respiratory infections and symptoms of infections than households with three or fewer people (OR: 3.88, 95% CI: 3.10, 4.84). **Figure S3** shows that the prevalence of respiratory infections and symptoms in each Oblast during the survey was >50%, and changes in the household number and household size between the beginning of the Russian invasion and the time of survey completion. Within this sample, six Oblasts experienced an increase in households by 11.4% to 18.6%, while another six saw decreases ranging from 10% to 100%. 110 survey respondents (5.2%) reported living in one of the four Oblasts under Russian military control (Donetsk, Kherson, Luhansk, Zaporizhia) at the start of the war (**Figure S4**). Most of these respondents (76.4%) reported moving away to other Oblasts during the war. Compared to respondents from other areas, these 110 respondents were more likely to be older (p=0.02), move to another Oblast (p<0.001), and report cold injuries (p=0.044). Households with children and older adults were more likely to experience respiratory infections and symptoms than households with no children or older adults (0.7% in Category A) (**Figure S5**). The model’s 90.44% accuracy in predicting seasonal respiratory infections and symptoms is attributable to the significant association between children and older adults in households (**Figure S6, Table S18**). The confusion matrix reveals that in households without either children or older adults, there were 595 households without respiratory infections and symptoms, which the model correctly predicted, and only 4 households experienced respiratory infections and symptoms that the model could not foresee. In households with either children or older adults, 1495 instances experienced the respiratory infections and symptoms that the model accurately predicted, but 217 households did not have the respiratory infections and symptoms that the model incorrectly predicted (**Figure S7**).

Out of 116 features, 16 were important features of respiratory infections and symptoms (Figures 1 & 2), while 15 were strong features of cold injuries (Figure 3).

**Reference**

1. Peiris AN, Jaroudi S, Gavin M. Hypothermia. *JAMA* 2018; **319**(12): 1290.

2. Mistry K, Ondhia C, Levell NJ. A review of trench foot: a disease of the past in the present. *Clin Exp Dermatol* 2020; **45**(1): 10-4.

3. Nyssen A, Benhadou F, Magnee M, Andre J, Koopmansch C, Wautrecht JC. Chilblains. *Vasa* 2020; **49**(2): 133-40.

4. Dubey S, Joshi N, Stevenson O, Gordon C, Reynolds JA. Chilblains in immune-mediated inflammatory diseases: a review. *Rheumatology (Oxford)* 2022; **61**(12): 4631-42.

5. McIntosh SE, Opacic M, Freer L, et al. Wilderness Medical Society practice guidelines for the prevention and treatment of frostbite: 2014 update. *Wilderness Environ Med* 2014; **25**(4 Suppl): S43-54.

6. Cauchy E, Chetaille E, Marchand V, Marsigny B. Retrospective study of 70 cases of severe frostbite lesions: a proposed new classification scheme. *Wilderness Environ Med* 2001; **12**(4): 248-55.

7. Drinane J, Kotamarti VS, O'Connor C, et al. Thrombolytic Salvage of Threatened Frostbitten Extremities and Digits: A Systematic Review. *J Burn Care Res* 2019; **40**(5): 541-9.

8. Drinane J, Heiman AJ, Ricci JA, Patel A. Thrombolytic Salvage of the Frostbitten Upper Extremity: A Systematic Review. *Hand (N Y)* 2022; **17**(3): 397-404.

9. Jurkovich GJ. Environmental cold-induced injury. *Surg Clin North Am* 2007; **87**(1): 247-67, viii.

10. Koljonen V, Andersson K, Mikkonen K, Vuola J. Frostbite injuries treated in the Helsinki area from 1995 to 2002. *J Trauma* 2004; **57**(6): 1315-20.

11. Blair JR, Schatzki R, Orr KD. Sequelae to cold injury in one hundred patients; follow-up study four years after occurrence of cold injury. *J Am Med Assoc* 1957; **163**(14): 1203-8.

12. Golant A, Nord RM, Paksima N, Posner MA. Cold exposure injuries to the extremities. *J Am Acad Orthop Surg* 2008; **16**(12): 704-15.

13. Nygaard RM, Lacey AM, Lemere A, et al. Time Matters in Severe Frostbite: Assessment of Limb/Digit Salvage on the Individual Patient Level. *J Burn Care Res* 2017; **38**(1): 53-9.

14. Irarrazaval S, Besa P, Cauchy E, Pandey P, Vergara J. Case Report of Frostbite with Delay in Evacuation: Field Use of Iloprost Might Have Improved the Outcome. *High Alt Med Biol* 2018; **19**(4): 382-7.

15. Pandey P, Vadlamudi R, Pradhan R, Pandey KR, Kumar A, Hackett P. Case Report: Severe Frostbite in Extreme Altitude Climbers-The Kathmandu Iloprost Experience. *Wilderness Environ Med* 2018; **29**(3): 366-74.

16. Cauchy E, Davis CB, Pasquier M, Meyer EF, Hackett PH. A New Proposal for Management of Severe Frostbite in the Austere Environment. *Wilderness Environ Med* 2016; **27**(1): 92-9.

17. Greenwald D, Cooper B, Gottlieb L. An algorithm for early aggressive treatment of frostbite with limb salvage directed by triple-phase scanning. *Plast Reconstr Surg* 1998; **102**(4): 1069-74.

18. Handford C, Thomas O, Imray CHE. Frostbite. *Emerg Med Clin North Am* 2017; **35**(2): 281-99.

19. Cauchy E, Marsigny B, Allamel G, Verhellen R, Chetaille E. The value of technetium 99 scintigraphy in the prognosis of amputation in severe frostbite injuries of the extremities: A retrospective study of 92 severe frostbite injuries. *J Hand Surg Am* 2000; **25**(5): 969-78.

20. Page RE, Robertson GA. Management of the frostbitten hand. *Hand* 1983; **15**(2): 185-91.

21. Knize DM, Weatherley-White RC, Paton BC, Owens JC. Prognostic factors in the management of frostbite. *J Trauma* 1969; **9**(9): 749-59.

22. Ingram BJ, Raymond TJ. Recognition and treatment of freezing and nonfreezing cold injuries. *Curr Sports Med Rep* 2013; **12**(2): 125-30.

23. Johnston AM, Singleton J. Cold feet. *BMJ* 2016; **354**: i4584.

24. Breiman L. (2001) Random forests. Mach. Learn., 45, 5–32.

25. A. Géron, Hands-on machine learning with Scikit-Learn, Keras, and TensorFlow (O'Reilly Media, Inc, 2022).
